# Supplementary material for: A hydrogeomorphic dataset for characterizing catchment hydrological behavior across the Tibetan Plateau
Source: Copernicus journal article supplement (doi:10.5194/essd-16-1651-2024), 2024-04-03
Supplement: Supplementary file 1 [file essd-16-1651-2024-supplement.pdf]

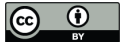

*Supplement of*

## **A hydrogeomorphic dataset for characterizing catchment hydrological behavior across the Tibetan Plateau**

**Yuhan Guo et al.**

*Correspondence to:* Hongxing Zheng ([hongxing.zheng@csiro.au](mailto:hongxing.zheng@csiro.au))

The copyright of individual parts of the supplement might differ from the article licence.

**Table S1 Look-up table of parameters in flow velocity equations in relation to land cover type**

| Corine code | Land cover type                                                                       | K (Darcy–Weisbach) | n (Manning's) | a (SCS) |
|-------------|---------------------------------------------------------------------------------------|--------------------|---------------|---------|
| 111         | Continuous urban fabric                                                               | 1000               | 0.03          | 2.96    |
| 112         | Discontinuous urban fabric                                                            | 1000               | 0.05          | 2.96    |
| 121         | Industrial or commercial units                                                        | 1000               | 0.03          | 2.96    |
| 124         | Airports                                                                              | 1000               | 0.05          | 2.96    |
| 131         | Mineral extraction sites                                                              | 1000               | 0.05          | 2.96    |
| 133         | Construction sites                                                                    | 1000               | 0.05          | 2.96    |
| 142         | Sportand leisure facilities                                                           | 1000               | 0.03          | 2.96    |
| 211         | Non-irrigated arable land                                                             | 4000               | 0.12          | 2.06    |
| 212         | Permanently irrigated land                                                            | 4000               | 0.12          | 2.06    |
| 221         | Vine yards                                                                            | 4000               | 0.15          | 2.06    |
| 222         | Fruit trees and berry plantations                                                     | 4000               | 0.15          | 2.06    |
| 223         | Olive groves                                                                          | 4000               | 0.12          | 2.06    |
| 231         | Pastures                                                                              | 15000              | 0.25          | 2.59    |
| 241         | Annual crops associated with permanent crops                                          | 15000              | 0.25          | 2.59    |
| 242         | Complex cultivation                                                                   | 15000              | 0.25          | 2.59    |
| 243         | Land principally occupied by agriculture,with significant areas of natural vegetation | 10000              | 0.15          | 2.59    |
| 244         | Agro-forestry areas                                                                   | 15000              | 0.3           | 2.59    |
| 311         | Broad-leaved forest                                                                   | 20000              | 0.6           | 0.73    |
| 312         | Coniferous forest                                                                     | 20000              | 0.6           | 0.73    |
| 313         | Mixed forest                                                                          | 20000              | 0.6           | 0.73    |
| 321         | Natural grass land                                                                    | 15000              | 0.25          | 2.59    |
| 322         | Moors and heathland                                                                   | 15000              | 0.25          | 2.59    |
| 323         | Sclerophyllous vegetation                                                             | 15000              | 0.25          | 2.59    |
| 324         | Transitional woodland shrub                                                           | 15000              | 0.25          | 2.59    |
| 331         | Beaches, dunes, and sandplains                                                        | 15000              | 0.3           | 2.59    |
| 332         | Bare rock                                                                             | 2000               | 0.1           | 2.96    |
| 333         | Sparsely vegetated areas                                                              | 10000              | 0.13          | 2.59    |
| 334         | Burnt areas                                                                           | 2000               | 0.1           | 2.96    |
